# High variation in handling times confers 35-year stability to predator feeding rates despite altered prey abundances and apparent diet proportions

Mark Novak

Department of Integrative Biology, Oregon State University,  
Corvallis, Oregon, 97331 USA

RUNNING TITLE: Stability of feeding rates

---

|                             |                            |
|-----------------------------|----------------------------|
| <b>Words in abstract</b>    | 232                        |
| <b>Words in manuscript</b>  | 6212                       |
| <b>Number of references</b> | 84                         |
| <b>Number of figures</b>    | 5                          |
| <b>Number of tables</b>     | 1                          |
| <b>Phone</b>                | (541) 737-3610             |
| <b>Fax</b>                  | (541) 737-3120             |
| <b>Email</b>                | mark.novak@oregonstate.edu |

---

## Contents

|                                                       |           |
|-------------------------------------------------------|-----------|
| <b>Introduction</b>                                   | <b>2</b>  |
| <b>Methods</b>                                        | <b>5</b>  |
| Data collection . . . . .                             | 5         |
| Study system . . . . .                                | 5         |
| Feeding surveys . . . . .                             | 5         |
| Prey abundance surveys . . . . .                      | 7         |
| Species identifications . . . . .                     | 7         |
| Data analysis . . . . .                               | 8         |
| Estimating feeding rates . . . . .                    | 8         |
| Comparisons of 1968–9 & 2004 . . . . .                | 11        |
| <b>Results</b>                                        | <b>13</b> |
| Feeding survey sites . . . . .                        | 13        |
| Feeding and abundance survey sites . . . . .          | 17        |
| <b>Discussion</b>                                     | <b>18</b> |
| The inevitability of feeding-rate stability . . . . . | 20        |
| Generality and assumptions . . . . .                  | 23        |
| Conclusions . . . . .                                 | 26        |
| <b>Acknowledgments</b>                                | <b>27</b> |
| <b>Code and data availability</b>                     | <b>27</b> |

## 1 Abstract

2 Historical resurveys of ecological communities are important for placing the structure of modern  
3 ecosystems in context. Rarely, however, are snapshot surveys alone sufficient for providing direct  
4 insight into the rates of ecological processes that underlie how communities function, either now  
5 or in the past. In this study, I used a statistically-reasoned observational approach to estimate  
6 the feeding rates of a New Zealand intertidal predator, *Haustorium haustorium*, using diet surveys  
7 performed at several sites by Robert Paine in 1968–9 and by me in 2004. Comparisons between  
8 time periods reveal a remarkable consistency in *H. haustorium*'s prey-specific feeding rates,  
9 which contrasts with the changes I observed in prey abundances, *H. haustorium*'s body size  
10 distribution, and the proportional contributions of *H. haustorium*'s prey to its apparent diet.  
11 Although these results imply accompanying and perhaps adaptive changes in *H. haustorium*'s  
12 prey preferences, they are nonetheless anticipated by *H. haustorium*'s high range of variation in  
13 prey-specific handling times that dictate not only its maximum possible feeding rates but also  
14 the probabilities with which feeding events may be detected during diet surveys. Similarly high  
15 variation in detection times (i.e. handling and digestion times) is evident in predator species  
16 throughout the animal kingdom. The potential disconnect between a predator's apparent diet  
17 and its actual feeding rates suggests that much of the temporal and biogeographic variation that  
18 is perceived in predator diets and food-web structures may be of less functional consequence than  
19 currently assumed.

20 **Keywords:** *attack rate variation, adaptive dynamics, diet survey, process rates, correlation of*  
21 *ratios, spurious correlation*

## 22 Introduction

23 Historical resurveys of ecological communities provide an important means to document com-  
24 munity change and contextualize the state of modern ecosystems (Moritz *et al.*, 2008; Tingley  
25 *et al.*, 2009; Chen *et al.*, 2009; Sorte *et al.*, 2017). Although such resurveys typically involve  
26 the comparison of only pairs of points in time, their advantages include the ability to quantify  
27 change relative to time periods before the onset of time-series monitoring, which rarely extends  
28 prior to the 1970s (Hughes *et al.*, 2017; Kuebbing *et al.*, 2018). Overall, many historical resur-  
29 veys have documented substantial changes in community structure (i.e. species composition and  
30 abundances); changes that are often, but not always, attributable to climate change, land use,  
31 and other, more direct human impacts (Rowe & Terry, 2014; Perry *et al.*, 2005; Riddell *et al.*,  
32 2021).

33 Rarely, however, is it possible to use such snapshot surveys to go beyond the characteriza-  
34 tion of community structure to quantify the rates of the biological processes that underlie how  
35 communities function, such as growth, predation, and competition (Paine, 1966; McCoy & Pfis-  
36 ter, 2014; Urban *et al.*, 2016). Studies in which this has been possible have revealed sometimes  
37 unexpected insights. For example, Rowe *et al.* (2011) combined historic and modern surveys of  
38 small mammal species and their body-size distributions with metabolic scaling laws to relate  
39 changes in community structure to marked declines in rates of total energy use within Great  
40 Basin communities since the late 1920s. These patterns, however, contrasted markedly with the  
41 findings of Terry & Rowe (2015) who used the same approach to reveal that, despite substantial

42 changes in small mammal body-size distributions and community structure, total energy use  
43 remained stable over the period of rapid climate warming that occurred at the terminal Pleis-  
44 tocene. Studies that quantify process rates can therefore provide levels of insight into underlying  
45 drivers of change or stasis that surveys of community structure alone may miss.

46 Unfortunately, most survey studies that quantify process rates have had to rely on species-  
47 agnostic theory or empirical relationships (such as metabolic scaling laws) or have depended on  
48 the existence of parameter-rich physiology-based models. For example, Acheson *et al.* (2012)  
49 used a bioenergetic model to combine estimates of apparent diet and prey availability with esti-  
50 mates of individual growth rates from scale circuli to simulate and compare rates of prey biomass  
51 consumption by Steelhead fishes over 18 years in the North Pacific. Although the mechanistic ba-  
52 sis and structural assumptions of such models are often well-grounded and empirically-validated  
53 by applications in present-day settings, their appropriateness to historical time periods can be  
54 difficult to affirm or rely upon given compounding estimation uncertainties and the pace by  
55 which evolutionary and other biological changes (e.g., behavioural plasticity) can proceed.

56 In this study, I used an alternative, statistically-reasoned approach to directly estimate  
57 and assess changes in the prey-specific feeding rates of a predatory intertidal whelk, *Haustorium*  
58 *haustorium*, whose diet was surveyed at several northern New Zealand sites by Robert (Bob) T.  
59 Paine (Estes *et al.*, 2016; Dayton *et al.*, 2016; Palumbi *et al.*, 2017; Power *et al.*, 2018) in 1968–  
60 1969 and which I resurveyed in 2004. The approach I used to estimate feeding rates contrasts  
61 with the aforementioned theory and model-based approaches in minimally requiring data on only

62 two aspects of predator foraging: estimates of a predator's apparent diet from feeding surveys  
63 (i.e. diet proportions) and estimates of feeding events' detection times (defined below). Based  
64 on the 35-year time-span and an expectation of non-equilibrium, dynamically-changing species  
65 interactions and abundances in the region (e.g., Benincà *et al.*, 2015) and intertidal systems in  
66 general (e.g., Katz, 1985; Menge *et al.*, 2022; Sorte *et al.*, 2017), I naively expected to see a weak  
67 correspondence between the feeding rates of the two time periods. Instead, my comparisons  
68 revealed a remarkable stability in *H. haustorium*'s prey-specific feeding rates that contrasted  
69 with the changes I observed in prey abundances, *H. haustorium*'s body-size distribution, and  
70 the proportional contributions of *H. haustorium*'s prey species to its apparent diet. Additional  
71 analyses implicated similarly-large changes in *H. haustorium*'s prey-specific per capita attack  
72 rates (i.e. its prey preferences).

73 I recognized the inevitability of *H. haustorium*'s feeding-rate consistency only in hindsight.  
74 The underlying mechanism — attributable to the wide range of *H. haustorium*'s handling times  
75 across its many prey species — has nonetheless been recognized for over 120 years as the effect  
76 of correlated denominators on the correlation of ratios (Pearson, 1897). The results of my  
77 analyses thereby speak to the importance of statistical thinking when interpreting survey data,  
78 and to the importance of studying ecological process rates rather than community structure  
79 alone. They also emphasize the importance of distinguishing between a predator's apparent and  
80 true diet when making temporal (or geographic) comparisons to understand how food webs and  
81 communities function.

## 82 **Methods**

### 83 **Data collection**

### 84 **Study system**

85 *Haustum haustorium* is a muricid whelk that is endemic to the North and South Islands of New  
86 Zealand (Tan, 2003). Its fossil record shows *H. haustorium* to have grown to 80 mm shell length  
87 (Tan, 2003), but in modern times its size rarely exceeds 55 mm (Novak, 2008).<sup>1</sup> Its diet varies  
88 through ontogeny, but primarily consists of herbivorous limpets, chitons and snails, filter-feeding  
89 barnacles and mussels, and its congener *H. scobina* (formerly *Lepsiella scobina*) with whom it  
90 shares many prey species (Luckens, 1975; McKoy, 1969; Morton & Miller, 1968; Ottaway, 1977;  
91 Patrick, 2001; Walsby, 1977; Novak, 2008; 2010; 2013). *H. haustorium* drills through the shells  
92 of its prey and/or flips them over to digest and ingest the “soup” through its extended proboscis  
93 (Fig. 1). A feeding event can last hours to more than a day and thus through one or more  
94 low-tide periods depending on the temperature, the prey’s identity, and the sizes of the whelk  
95 and prey individual (Novak, 2010; 2013).

### 96 **Feeding surveys**

97 Feeding surveys during low-tide periods are a standard means to determine the apparent diet  
98 of whelks and many other intertidal predators (e.g., Paine, 1963; Menge, 1974; Hughes & Bur-  
99 rows, 1991; Yamamoto, 2004). They consist of a systematic search of an area of rocky shore,  
100 carefully inspecting each found individual to determine whether or not it is feeding, measuring

---

<sup>1</sup>Paine’s notebook records his having measured the shells of 15 large individuals, 65.0, 65.5, 65.7, 66.2, 67.5, 68.0, 68.3, 68.5, 68.6, 69.4, 69.6, 71.9, 73.1, 74.0 and 76.8 mm in length, in a Maori midden of unknown age found somewhere between North Cape (Otou) and Parengarenga Harbour.



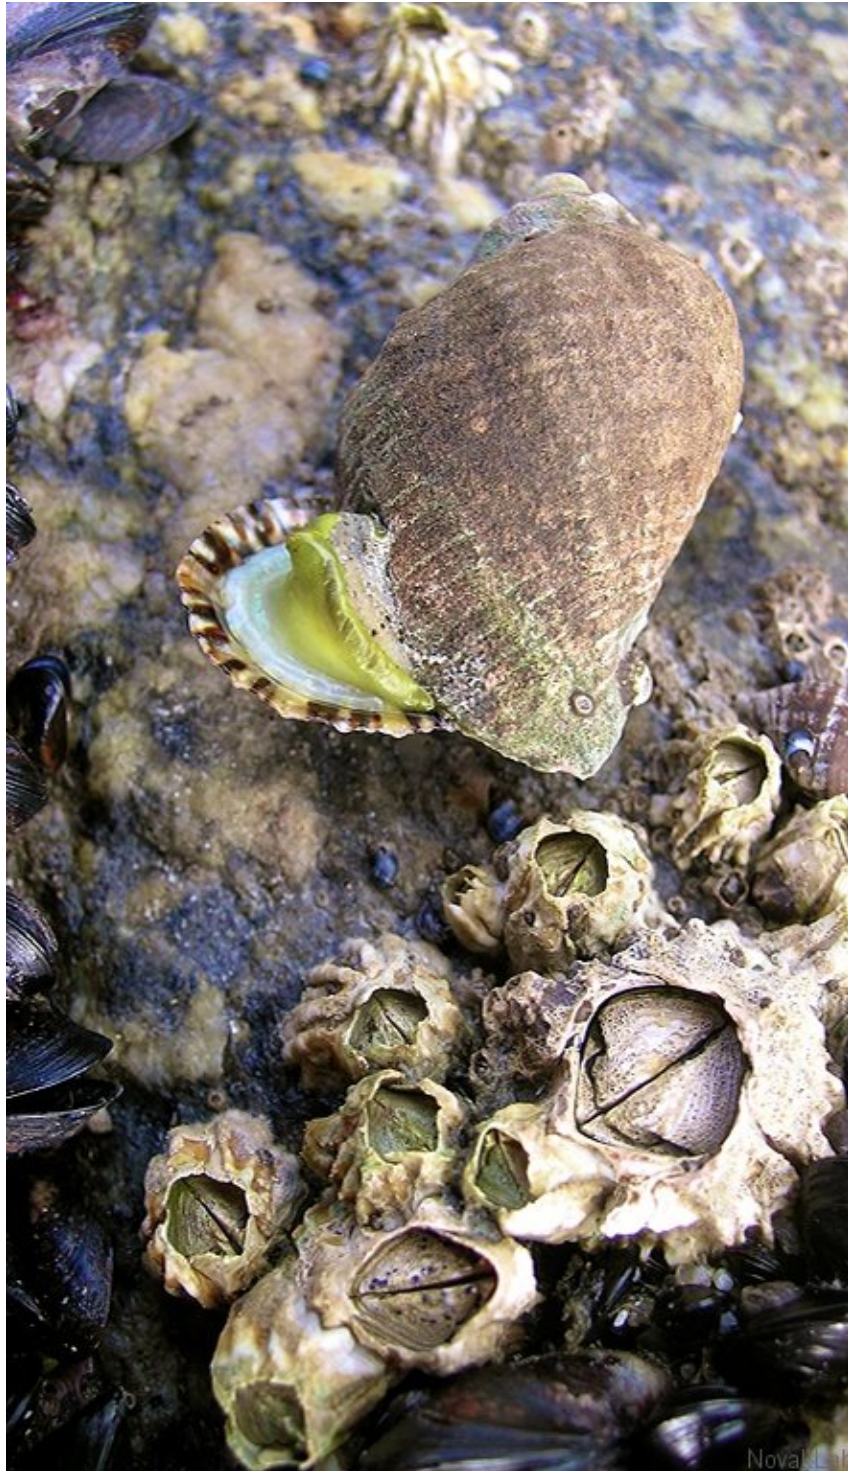

Figure 1: *Haustorium haustorium* feeding on the limpet *Cellana ornata*, surrounded by additional prey species: *Xenostrobus pulex* mussels, *Epopella plicata* and *Chamaesipho columna* barnacles, *Austrolittorina antipodum* snails, and its congeneric intraguild prey, *H. scobina* (center right).



101 its shell length ( $\pm 1$  mm) and, if it is feeding, identifying and measuring the size of its prey.  
102 Paine conducted such surveys at ten sites along the northern coast of the North Island between  
103 November 1968 and May 1969 (Table S1). In June 2004, using Paine’s site names, descriptions,  
104 and hand-drawn maps, I was able to relocate and access five of the same sites to resurvey *H.*  
105 *haustorium*’s diet using the same protocols.

### 106 **Prey abundance surveys**

107 Paine also conducted abundance surveys of *H. haustorium*’s prey species at several sites, in-  
108 cluding three of the sites where he performed feeding surveys and which I was able to resurvey  
109 (Table S1). Abundance surveys entailed the use of a 0.3×0.3 m quadrat which Paine placed  
110 randomly at 15 positions along a transect line (of unknown length) located haphazardly within  
111 the same area in which feeding surveys were subsequently conducted. All mobile prey species  
112 within the quadrats were counted. I repeated these surveys using 15 quadrats positioned ran-  
113 domly along a 20 m transect. Paine often distinguished among tidal zones (e.g., the “oyster  
114 zone” and “1 ft. above *Xiphophora* zone”), surveying a transect (or two) in each of them. I  
115 matched my survey areas to these zones as best I could, though sometimes zonation patterns  
116 were not as clear as they had apparently been for Paine.

### 117 **Species identifications**

118 Three things are worth noting in regards to species identifications of key taxa:

- 119 (i) The whelk referred to as *Neothais scalaris* in the only paper that Paine published of his  
120 New Zealand work (Paine, 1971) is now called *Dicathais orbita*. Among its differences from

121 *H. haustorium* is that *Dicathais* occurs on more exposed shores where its apparent diet  
122 consists primarily of *Perna* mussels.

123 (ii) Although Paine (1971) mentions having observed *Dicathais* at multiple (unspecified) sites,  
124 and to have estimated its density to be 17 m<sup>-2</sup> at Red Beach, Whangaparoa Peninsula,  
125 specifically, I observed few to no *Dicathais* at the sites which I resurveyed, including the  
126 Red Beach, Whangaparoa Peninsula site that I surmised Paine to have surveyed for *H.*  
127 *haustorium*. I nonetheless consider it unlikely that Paine mistook small *H. haustorium* or  
128 *Paratrophon* spp. — which can appear similar to small *Dicathais* and which I did observe  
129 at Red Beach — for *Dicathais*.

130 (iii) It is possible that the prey species *H. scobina* reported on here (and in Novak (2010; 2013)  
131 for sites around the South Island) is conflated with the sister taxon *H. albomarginatum*  
132 (Barco *et al.* 2015; but see Tan 2003; O'Mahoney 2020).

### 133 **Data analysis**

#### 134 **Estimating feeding rates**

135 The approach I used for estimating *H. haustorium*'s prey-specific feeding rates from diet surveys  
136 appears to have been first used by Charles Birkeland (Birkeland, 1974) who obtained his Ph.D.  
137 with Paine as primary advisor. It was re-derived by Novak *et al.* (2017) and ostensibly several  
138 others (Bajkov, 1935; Englund & Leonardsson, 2008; Speirs *et al.*, 2000; Woodward *et al.*, 2005).

139 The approach relies on the following information:

140 (i) the count of the number of predator individuals that, in the course of a snapshot diet

- 141 survey, are observed to be feeding on each focal prey species ( $n_i$ );
- 142 (ii) the count of the total number of predator individuals that are surveyed ( $n$ ); and
- 143 (iii) an estimate of the (average) length of time over which a feeding event on each focal prey
- 144 species remains detectable to an observer ( $d_i$ ).

145 A formal derivation is summarized as follows: Consider a generalist predator population

146 whose diet consists of  $i = 1, \dots, S$  different prey species on which predator individuals feed

147 only one prey item at a time. If  $f_i$  is the predator population's average feeding rate on the  $i^{\text{th}}$

148 prey species (which we wish to estimate) then, over some time period  $T$ , an average individual

149 will consume  $f_i T$  individuals of prey  $i$ . If each of these feeding events remains detectable to

150 an observer for time  $d_i$  then the total time that the predator individual could have been seen

151 feeding in time period  $T$  is  $f_i d_i T$  and the proportion of time it could have been seen feeding

152 on prey  $i$  is  $f_i d_i$ . It follows that, if we perform a snapshot feeding survey of  $n$  independent

153 and equivalent predator individuals, the expected proportion of individuals we should observe

154 feeding on each prey species,  $p_i$ , will also be  $f_i d_i$ . Therefore, and since the maximum likelihood

155 estimator of  $p_i$  is  $n_i/n$ , we can estimate prey-specific feeding rates as

$$f_i = \frac{n_i}{n} \frac{1}{d_i}. \quad (1)$$

156 In using the approach we make no assumptions regarding the form of the predator's functional

157 response and need not know prey nor predator abundances.

158 Clearly, the primary challenge for applying the approach to diet surveys is to have informa-

159 tion on detection times. Indeed, depending on its detection time, a species that is frequently  
160 observed in a predator's apparent diet may in fact be only infrequently consumed by the preda-  
161 tor if its detection time is long (Novak, 2010; Fairweather & Underwood, 1983). I estimated *H.*  
162 *haustorium*'s prey-specific detection times (in days) on the basis of extensive laboratory experi-  
163 ments which I had previously performed for *H. haustorium* populations of New Zealand's South  
164 Island (Novak, 2013). These experiments involved placing individuals of varied sizes into isolated  
165 aquaria, providing them focal prey of varied sizes and identities, and subsequently classifying  
166 each whelk as either feeding or not feeding on a near hourly basis or continuously with video  
167 surveillance. Whelk and prey size combinations maximized or exceeded the range of relative  
168 sizes observed in the field. The temperature was varied between 10 and 18 °C by placing the  
169 aquaria in temperature-controlled rooms. For each prey species, I regressed the observed detec-  
170 tion times on whelk size, prey size, and temperature (all variables  $\log_e$ -transformed, see Novak,  
171 2013) and used the resulting regression coefficients to back-calculate the expected detection time  
172 of each feeding event that Paine and I had observed in the field. In doing so, I used the mean  
173 water temperature measured in the given year and month at the Leigh Marine Laboratory for  
174 all surveyed sites (Evans & Atkins, 2013; Costello, 2015), the laboratory being centrally located  
175 to all sites and providing the only *in situ* temperature record that extends to the 1960s. Prey  
176 for which I had not estimated detection-time regression coefficients in the experiments were  
177 matched to the most similar species for which they had been estimated (Table S2). Feeding  
178 observations in which either the size of the prey or whelk were unknown (typically because the

179 prey was “swallowed” when the predator closed its operculum too quickly) were assigned the  
180 species’ mean detection time across all observations.

### 181 **Comparisons of 1968–9 & 2004**

182 I used several measures of correlation and deviation to quantify the similarity of feeding rates  
183 between 1968–9 and 2004. I ignored prey species that were not observed in *H. haustorium*’s diet  
184 at a given site in both time periods and used all remaining time-period pairs of site-specific prey  
185 species from across all five sites to calculate similarities (see *Supplementary Materials* for analyses  
186 including species observed in only one time period). As is typically the case (e.g., Preston  
187 *et al.*, 2019), feeding rates varied over several orders-of-magnitude and exhibited a right-skewed  
188 frequency distribution due to their underlying multiplicative nature. I therefore calculated the  
189 correlation between time periods in three ways: using Pearson’s linear correlation coefficient on  
190 the natural scale ( $r$ ), using Pearson’s correlation coefficient after  $\log_{10}$ -transformation ( $r_{10}$ ), and  
191 using Spearman’s rank correlation coefficient ( $r_s$ ). I estimated  $p$ -values using two-sided tests.  
192 I also calculated the mean logarithmic difference ( $MLD$ ) and the mean absolute logarithmic  
193 difference ( $MALD$ ) between feeding-rate pairs, these both being measures of relative similarity  
194 (since  $\log_{10}(x) - \log_{10}(y) = \log_{10}(x/y)$ ). I repeated these same calculations for the prey-specific  
195 diet proportions ( $p_i = n_i/n$ ) and the field-calculated detection times ( $d_i$ ), restricting these  
196 comparisons to the same site-prey pairs that were included in the comparison of the feeding  
197 rates.

198 In order to determine whether (dis)similarities between time periods in any of the just-

199 mentioned three variables were associated with changes in *H. haustorium*'s or its prey's sizes,  
200 I plotted histograms of whelk and prey sizes and formally assessed differences between time  
201 periods using two-sided Kolmogorov-Smirnov (KS) tests. I also used multiple linear regression  
202 to regress whelk size ( $\log_e$ -transformed) on prey size ( $\log_e$ -transformed), time period, and their  
203 first-order interaction to determine whether there was a change in *H. haustorium*'s prey-size  
204 selectivity.

205 Finally, in order to determine whether (dis)similarities between time periods in *H. hausto-*  
206 *rium*'s feeding rates were associated with changes in its prey preferences, I used the estimator  
207 derived by Novak & Wootton (2008) and clarified by Wolf *et al.* (2017) to calculate *H. hausto-*  
208 *rium*'s per capita attack rates. This estimator uses the same information as used to estimate  
209 feeding rates (i.e. the  $n_i$  prey observations and  $d_i$  detection times), but also makes use of the  
210 number of surveyed individuals that are observed to be *not* feeding ( $n_0$ ), requires knowledge of  
211 each prey's abundance ( $N_i$ ), and necessitates the specification of a functional-response model  
212 (Novak *et al.*, 2017). I assumed the multi-species extension of the Holling Type II functional  
213 response (e.g., Murdoch, 1973) and that *H. haustorium*'s handling times equaled its detection  
214 times (i.e.  $h_i = d_i$ ). Under these assumptions, which are well-justified for *H. haustorium* (see  
215 Novak, 2010; 2013; Novak *et al.*, 2017), the estimator for *H. haustorium*'s per capita attack rate  
216 on prey  $i$  is

$$a_i = \frac{n_i}{n_0} \frac{1}{h_i N_i}. \quad (2)$$

217 In absolute terms, these per capita attack rates represent the number of prey eaten per predator

218 per day per available prey, with abundances represented by densities (here per square meter).  
219 In relative terms, they represent the predator's prey preferences accounting for differences in  
220 prey handling times and abundances (Novak & Wootton, 2008).

221 Because the attack rate estimator requires estimates of prey abundances, I calculated attack  
222 rates only for the subset of three sites where both Paine and I had estimated these using  
223 quadrat surveys. I then calculated the between time-period correlations and deviations of the  
224 attack rates, feeding rates, diet proportions, detection times, and prey abundances for these  
225 sites just as described above. Finally, I used multiple linear regression to regress feeding rates  
226 ( $\log_e$ -transformed) on prey abundances ( $\log_e$ -transformed), time period, and their first-order  
227 interaction to determine whether there was an effect of time period on the density dependence  
228 of *H. haustorium*'s feeding rates (i.e. its across-species "functional response").

## 229 Results

### 230 Feeding survey sites

231 Across the five sites at which both Paine and I performed feeding surveys, Paine observed 232 of  
232 1101 total individuals feeding on 10 different species (Table 1). In my resurveys, I observed 160  
233 of 1567 total individuals feeding on 16 different species. Across sites, the proportions of feeding  
234 individuals ranged from 11.8 to 65.9% for Paine and from 5.2 to 27.3% for me. Paine observed  
235 *H. haustorium* feeding on 2 species that I did not observe whereas I observed it feeding on 8  
236 species that Paine did not, therefore together we observed *H. haustorium* feeding on 18 different  
237 prey species.



Table 1: Summary of Paine’s 1968-9 and my 2004 feeding observations. Observations refers to the total number of whelks inspected. % feeding refers to the proportion of observed whelks that were feeding. Parentheticals are the binomial confidence interval (95% coverage probability) calculated using the Wilson method.

| Site                                | Observations |      | % feeding        |                  |
|-------------------------------------|--------------|------|------------------|------------------|
|                                     | 1968-9       | 2004 | 1968-9           | 2004             |
| Leigh - Echinoderm Reef             | 228          | 72   | 13.6 (9.7-18.7)  | 13.9 (7.7-23.7)  |
| Leigh - Tabletop Rocks and Boulders | 44           | 268  | 65.9 (51.1-78.1) | 5.2 (3.1-8.6)    |
| Leigh - Waterfall Rocks             | 275          | 1060 | 17.5 (13.4-22.4) | 10.1 (8.4-12.1)  |
| Rangitoto Island - Whites Beach     | 93           | 130  | 11.8 (6.7-19.9)  | 20.8 (14.7-28.5) |
| Red Beach - Whangaparaoa            | 461          | 37   | 24.5 (20.8-28.6) | 5.4 (1.5-17.7)   |
| Sum/Average                         | 1101         | 1567 | 26.7             | 11.1             |

238 There were 7 species on which both Paine and I observed *H. haustorium* feeding at the same  
239 site. For these 7 species, there were 17 site-species feeding-rate pairs for me to compare between  
240 1968–9 and 2004 (Fig. 2A). These varied over two orders of magnitude (from  $1.71 \cdot 10^{-3}$  to  
241  $0.51 \cdot 10^{-1}$  prey per predator per day), were positively correlated between time periods for all  
242 three correlation measures ( $r = 0.58, p = 0.01; r_{10} = 0.79, p < 0.001; r_s = 0.78, p < 0.001$ ), and  
243 tended to be greater in 1968–9 than in 2004 (mean deviation and 95% bootstrapped confidence  
244 interval:  $MLD = 0.220$  (0.020, 0.418),  $MALD = 0.404$  (0.294, 0.520)).

245 In contrast to the feeding rate, *H. haustorium*’s apparent diet proportions showed relatively  
246 little similarity between time periods (Fig. 2B). That is, although the diet proportions exhibited  
247 similar variation within each time period (varying from  $2.83 \cdot 10^{-3}$  to  $1.8 \cdot 10^{-1}$ ), their between  
248 time-period correlations were lower and less clearly different from zero ( $r = 0.31, p = 0.22; r_{10} =$   
249  $0.46, p = 0.06; r_s = 0.52, p = 0.03$ ). They also tended to be greater in 1968–9 than in 2004  
250 ( $MLD = 0.233$  (0.018, 0.439),  $MALD = 0.433$  (0.313, 0.599)). On the other hand, mean detec-

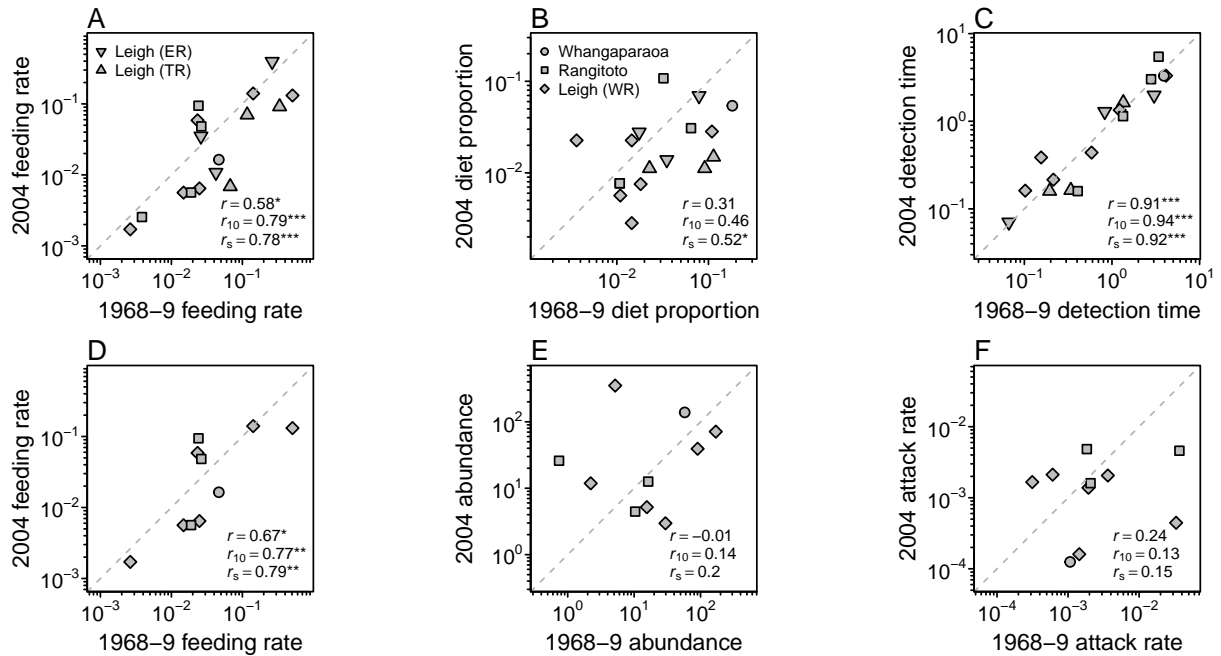

Figure 2: The between time-period correlation of prey-specific (A) feeding rates, (B) apparent diet proportions, and (C) detection times among all sites where Paine and I surveyed *H. haustorium*'s diet, and of prey-specific (D) feeding rates, (E) abundances, and (F) per capita attack rates for the subset of sites where Paine and I also surveyed prey abundances. I calculated three correlations for each comparison to assess the linearity and monotonicity of the time-period (dis)similarities: Pearson's correlation ( $r$ ), Pearson's correlation after log<sub>10</sub>-transformation ( $r_{10}$ , as plotted), and Spearman's rank correlation ( $r_s$ ). The probability of observing a correlation at least as extreme as the observed correlation under the null hypothesis of no correlation (two-tailed test) is indicated by asterisks: \*\*\*  $p < 0.001$ ; \*\*  $p < 0.01$ ; \*  $p < 0.05$ ; otherwise  $p > 0.1$ .

251 tion times were very similar between time periods (Fig. 2C). These varied over two orders of  
 252 magnitude (from 1.6 to 130.8 hours), were highly correlated between time periods for all three  
 253 measures ( $r = 0.92, p < 0.001$ ;  $r_{10} = 0.94, p < 0.001$ ;  $r_s = 0.92, p < 0.001$ ), and were not distin-  
 254 guishable between time periods ( $MLD = 0.011$  ( $-0.079, 0.100$ ),  $MALD = 0.149$  ( $0.094, 0.210$ )).

255 Although *H. haustorium*'s size range was unchanged between time periods, its size distribu-  
 256 tion showed a clear shift towards smaller individuals in 2004 relative to 1968-9 (Fig. 3; 1968-9:

257 9.8 – 63.0 mm,  $\bar{x} = 34.7$  mm; 2004: 9.0 – 62.0 mm,  $\bar{x} = 30.0$  mm; KS test:  $D = 0.30$ ,  
258  $p < 0.001$ , all five sites combined). The size distribution of prey individuals was also shifted  
259 towards smaller individuals in 2004 (Fig. 3; 1968-9: 1.0 – 36.0 mm,  $\bar{x} = 16.5$  mm; 2004: 2.0 – 28.0  
260 mm,  $\bar{x} = 10.2$  mm; KS test:  $D = 0.55$ ,  $p < 0.001$ ). *H. haustorium*'s relative prey-size selectiv-  
261 ity, however, appeared unchanged between time periods, with multiple regressions providing no  
262 support for main or interactive effects of time period (Fig. 3, Tables S3-S5,  $\log_e(\text{Predator size})$   
263  $= 2.34 + 0.46 \cdot \log_e(\text{Prey size})$ ,  $F_{1,381} = 629.9$ ,  $p < 0.001$ ,  $R_{adj}^2 = 0.62$  for both periods combined).

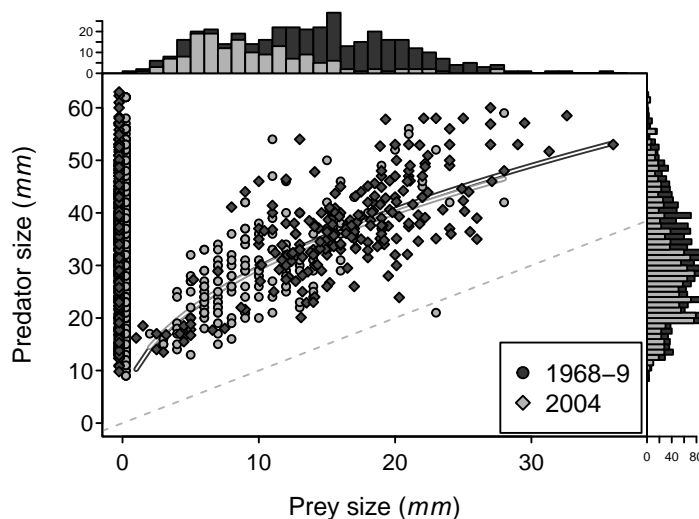

Figure 3: Although the sizes of *H. haustorium* individuals and the sizes of their prey individuals were smaller in 2004 than in 1968-9, *H. haustorium*'s size-selectivity was unchanged between time periods. See Tables S3-S5 for regression summaries. The values near a prey size of 0 mm indicate the sizes of non-feeding whelks and are omitted from the prey-size frequency histogram. Note that this figure includes the *H. haustorium* and prey individuals of all observations made at the five focal study sites (rather than just the subset of temporally-paired prey-specific estimates considered in Fig. 2).

## 264 Feeding and abundance survey sites

265 Feeding rates were even more clearly similar between time periods for the 10 pairs of site-species  
266 estimates (6 prey species) from the three sites where Paine and I performed both feeding and  
267 abundance surveys (Fig. 2D;  $r = 0.67, p = 0.03; r_{10} = 0.77, p < 0.01; r_s = 0.79, p < 0.01;$   
268  $MLD = 0.15 (-0.116, 0.394), MALD = 0.40 (0.283, 0.508)$ ). Just as seen when considering  
269 all five sites, the between time-period similarity of the apparent diet proportions was lower  
270 (not shown;  $r = 0.35, p = 0.32; r_{10} = 0.51, p = 0.13; r_s = 0.62, p = 0.053; MLD = 0.147$   
271  $(-0.165, 0.416), MALD = 0.447 (0.322, 0.574)$ ), but the similarity of mean detection times was  
272 high (not shown;  $r = 0.90, p < 0.001; r_{10} = 0.93, p < 0.001; r_s = 0.87, p = 0.003; MLD = -0.006$   
273  $(-0.138, 0.123), MALD = 0.161 (0.085, 0.250)$ ).

274 Prey abundances varied over two orders of magnitude within both time periods (varying from  
275 0.74 to 351 individuals per  $m^2$ ), but showed no correspondence between time periods (Fig. 2E;  
276  $r = -0.009, p = 0.98; r_{10} = 0.14, p = 0.71; r_s = 0.2, p = 0.58; MLD = -0.178 (-0.746, 0.338),$   
277  $MALD = 0.718 (0.420, 1.073)$ ). This was similarly true for the estimates of *H. haustorium*'s  
278 per capita attack rates, which also varied over three orders of magnitude within time periods  
279 (varying from  $5.2 \cdot 10^{-6}$  to  $1.5 \cdot 10^{-3}$  prey per predator per day per prey available) but showed  
280 no correspondence between time periods (Fig. 2F;  $r = 0.24, p = 0.50; r_{10} = 0.13, p = 0.72; r_s =$   
281  $0.15, p = 0.68; MLD = 0.348 (-0.116, 0.835), MALD = 0.685 (0.402, 1.017)$ ).

282 Regressing feeding rates on prey abundances did not show main or interactive effects of  
283 time period on the density dependence of *H. haustorium*'s across-species "functional response"

284 (Tables S6-S7), with the simpler model combining time periods revealing that feeding rates  
285 increased with a decelerating rate as prey abundances increased (Fig. 4, Table S8,  $\log_{10} f_i =$   
286  $-2.26 + 0.52 \cdot \log_{10} N_i$ ,  $F_{1,23} = 8.41$ ,  $p = 0.008$ ,  $R_{adj}^2 = 0.24$ ).

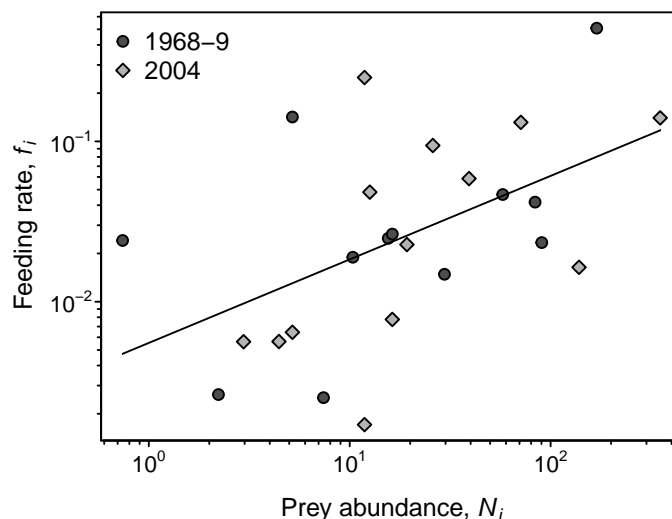

Figure 4: *H. haustorium*'s prey-specific feeding rates (prey eaten per predator per day) increased as a decelerating function (logarithmic slope  $< 1$ ) of prey abundance (per  $m^2$ ) and were not distinguishable by time period (Tables S6-S8). Note that this regression includes five temporally-unpaired estimates that reflect feeding rate and abundance estimates for prey species which only Paine *or* I observed (rather than just the subset of temporally-paired prey-specific estimates considered in Fig. 2).

## 287 Discussion

288 That feeding rates are dynamic and respond to many aspects of a predator's environment is a  
289 central, well-supported thesis. The importance of predator and prey abundances, their body  
290 sizes, and environmental temperature has elicited particularly strong research attention within  
291 the vast literatures relating to predator foraging ecology, food webs, and the impacts of climate  
292 change. Although water temperatures in northern New Zealand have not exhibited a systematic

293 trend to date (Shears & Bowen, 2017), my resurveys of Bob Paine’s study sites revealed little  
294 similarity in *H. haustorium*’s apparent diet between 1968–9 and 2004. My resurveys further  
295 showed an overall reduction in *H. haustorium*’s body size which, though not associated with  
296 changes in the *relative* size of chosen prey individuals, was accompanied by substantial changes  
297 in community structure. These changes in apparent diet proportions and prey abundances  
298 inferred by my main analyses are corroborated by additional comparisons that included (rather  
299 than excluded) species observed by only Paine or only me (see *Supplementary Materials*).

300       Given these observations and their consistency with the dynamic nature of rocky intertidal  
301 systems in the region (e.g., Benincà *et al.*, 2015) and the world more generally (e.g., Katz,  
302 1985; Menge *et al.*, 2022; Sorte *et al.*, 2017), I expected *H. haustorium*’s prey-specific feeding  
303 rates to have been similarly altered in the 35 years that separated Paine’s and my surveys.  
304 Instead, as estimated by a statistically-reasoned approach that does not rely on species-agnostic  
305 scaling laws, parameter-rich energetic models, or even the specification of a particular functional-  
306 response model, *H. haustorium*’s feeding rates showed a remarkable stability between the two  
307 time periods (Fig. 2A,D). That is, although feeding rates were overall higher in 1968–9 than  
308 in 2004 (possibly due to the change in *H. haustorium*’s body size), prey-specific feeding rates  
309 evidenced a high degree of temporal consistency in their relative within time-period magnitudes  
310 regardless of the metric of similarity I employed.

311       On the face of it, this contrast between *H. haustorium*’s feeding-rate stability versus the  
312 changes in its prey’s abundances and apparent diet contributions implies a substantial compen-

313 satory response in *H. haustorium*'s prey preferences. This inference was underscored by my  
314 comparison of *H. haustorium*'s per capita attack rates at the subset of sites where these could  
315 be estimated assuming a multi-species Type II functional response (for which the attack-rate  
316 parameters encapsulate prey preferences). That is, regardless of how their similarity was quan-  
317 tified, attack-rate estimates in 1968–9 showed no similarity to the estimates of 2004 (Fig. 2F).  
318 Indeed, the temporal consistency of the saturating (albeit loose) relationship between *H. haus-*  
319 *torium*'s feeding rates and its prey's abundances (Fig. 4) that was associated with these changes  
320 in attack rates could be inferred to indicate an adaptive response in prey preferences to altered  
321 prey abundances (*sensu* Abrams, 1999; Kondoh, 2003).

322 I believe this final inference to be incorrect however. Instead, I attribute the stability of *H.*  
323 *haustorium*'s feeding rates to a mechanism that is statistical in nature and was recognized in  
324 1897 soon after the formal definition of Pearson's measure of correlation itself.

### 325 **The inevitability of feeding-rate stability**

326 Pearson's correlation coefficient  $r$  is a measure of the linear association between two variables  
327 (Pearson, 1895; Bravais, 1844). Pearson (1897) was the first to note that two ratios ( $x/w$  and  
328  $y/z$ ) will be correlated when their denominator variables are correlated, even if the numerator  
329 variables are entirely uncorrelated. He derived the following expression with which to approx-  
330 imate this expected correlation of ratios using the correlations between each pair of variables



331 and each variable's coefficient of variation ( $v$ , its standard deviation divided by its mean):

$$r_{\frac{x}{w}, \frac{y}{z}} \approx \frac{r_{x,y}v_xv_y - r_{w,y}v_wv_y - r_{x,z}v_xv_z + r_{w,z}v_wv_z}{\sqrt{(v_y^2 + v_z^2 - 2r_{y,z}v_yv_z)}\sqrt{(v_w^2 + v_x^2 - 2r_{w,x}v_wv_x)}}. \quad (3)$$

332 Although it assumes that the coefficients of variation are small (Kim, 1999), and although  
 333 an exact expectation may be obtained with a permutation-based approach (see *Supplementary*  
 334 *Materials*), Pearson's approximation provides useful insight into how a correlation between ratios  
 335 will arise. In fact, in the context of understanding the stability of *H. haustorium*'s feeding rates  
 336 (i.e. where  $\frac{x}{w} = f_{1968-9}$  and  $\frac{y}{z} = f_{2004}$ ), the approximation may be further simplified by (i)  
 337 letting the numerator variables (the  $x, y$  apparent diet proportions;  $n_i/n$  in eqn. 1) and the  
 338 denominator variables (the  $w, z$  detection times;  $d_i$  in eqn. 1) be uncorrelated with each other  
 339 within and across time periods (i.e.  $r_{y,z} = r_{w,x} = r_{w,y} = r_{x,z} = 0$ ) and (ii) letting the coefficients  
 340 of variation of the two numerator variables and the two denominator variables each be the same  
 341 across time periods (i.e.  $v_n := v_y = v_x$  for the diet proportions and  $v_d := v_z = v_w$  for the  
 342 detection times). Under these simplifications, Pearson's approximation is reduced to

$$r_{\frac{x}{w}, \frac{y}{z}} \approx \frac{r_{x,y}v_n^2 + r_{w,z}v_d^2}{v_n^2 + v_d^2}. \quad (4)$$

343 Since the denominator of eqn. 4 simply scales the response between  $-1$  and  $+1$ , it follows that  
 344 feeding rates will tend to be positively correlated between time periods whenever the detection  
 345 times are positively correlated and exhibit a sufficiently large coefficient of variation across prey  
 346 species, even if the apparent diet proportions are uncorrelated or negatively correlated (Fig. 5).  
 347 Feeding-rate stability can therefore occur despite substantial changes in the predator's prey

348 preferences or its prey's abundances. The same logic applies using Spearman's rank correlation  
349 coefficient since it is just the Pearson correlation of rank-ordered values.

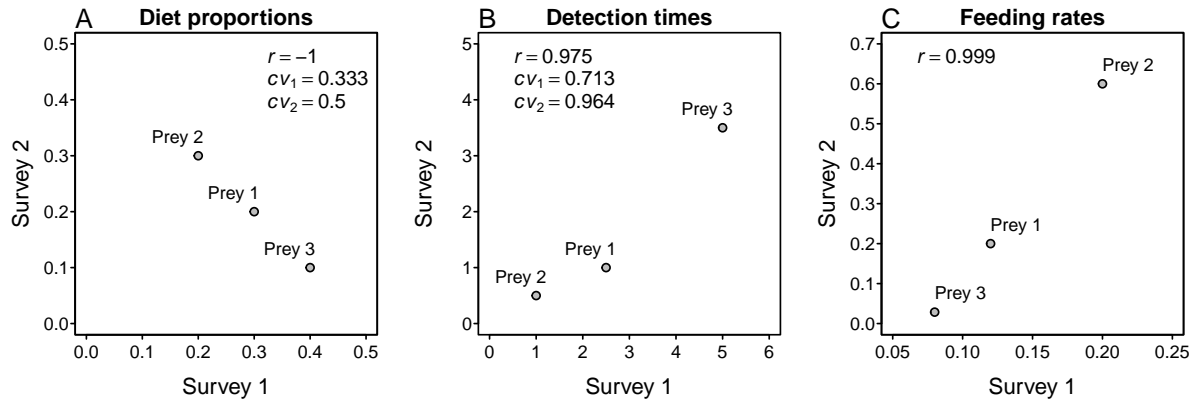

Figure 5: A hypothetical example of the statistical mechanism causing correlated ratios of which Pearson (1897) warned. The panels show two surveys between which a predator's (A) apparent diet proportions on three prey species are perfectly negatively correlated ( $r = -1.00$ ), but its (B) detection times are positively correlated ( $r = 0.975$ ) and exhibit sufficiently high coefficients of variation ( $cv$ ) for its (C) feeding rates to be strongly positively correlated ( $r = 0.999$ ). (Given correlations are exact, not estimated using eqns. 3 or 4.)

350 Pearson (1897) referred to the non-zero correlation of ratios involving uncorrelated numerator  
351 and correlated denominator variables as being spurious (but see Haig, 2003; for discussion of  
352 the term itself). When inference is being made regarding the relationship of the two numerator  
353 variables the issue is indeed a major problem that has plagued — and continues to plague —  
354 diverse scientific disciplines (e.g., Jackson & Somers, 1991; Kenney, 1982; Atkinson *et al.*, 2004;  
355 Håkanson & Stenström-Khalili, 2009; Williams *et al.*, 2021), leading many to infer a relationship  
356 between measured variables when in fact none exists. However, as first noted by Yule (1910), the  
357 relationship is not spurious when inference is being made regarding the ratios (Aldrich, 1995),  
358 as is the case in using eqn. 1 to estimate feeding rates. That is, the correlation of ratios due to

359 correlated denominator variables reflects (the linear aspect of) the true relationship between the  
360 ratios themselves. The stability of *H. haustorium*'s feeding rates between the two time periods  
361 is therefore not a spurious inference. Instead, it is the inevitable consequence of *H. haustorium*'s  
362 positively-correlated and wide-ranging detection times that are themselves a direct consequence  
363 of the wide-ranging handling times that *H. haustorium* exhibits across its diverse diet.

### 364 **Generality and assumptions**

365 At the species level, *H. haustorium*'s detection times were estimated to vary between 1.6 and  
366 130.8 hours. A wide range of detection times is typical for whelks (e.g., Yamamoto, 2004)  
367 and many other taxonomically-diverse consumers — from fishes to birds, seastars, spiders, and  
368 flies (e.g., Preston *et al.*, 2017; Hilton *et al.*, 1998; Uiterwaal & DeLong, 2020; Campos &  
369 Lounibos, 2000; Menge, 1972) — and is the consequence of a wide variety of both general  
370 and specific prey attributes. These include differences in digestible tissue mass (e.g., acorn  
371 barnacles are smaller than mussels), chemical defenses (e.g., *H. scobina* exudes a dark purple  
372 substance when consumed by *H. haustorium* (*pers. obs.*) and takes much longer to consume  
373 than similarly-sized gastropods (Novak, 2013)), and structural defenses (e.g., the pulmonate  
374 limpet *Siphonaria australis* with its mucous-rich foot is typically drilled while patellid limpets  
375 like *Cellana ornata* are simply flipped (Fig. 1, *pers. obs.*)). For such fundamental aspects of  
376 biology to dramatically change in a way that reduces variation over ecological time-scales seems  
377 unlikely (but see Thompson, 1998; and many others).

378 The greatest weakness of the above-argued reason for *H. haustorium*'s feeding-rate consis-

379 tency is therefore my inference that its detection times remained positively correlated between  
380 time periods (i.e.  $r_{w,z} > 0$  in eqn. 4), this being not only a matter of the species' biological  
381 attributes but also of *H. haustorium*'s behavioural prey choices and predatory tactics, which  
382 are likely to be far more labile<sup>2</sup> (Blomberg *et al.*, 2003). More specifically, although I did not  
383 assume a given species' detection time was the same between time periods, I did assume that  
384 whelks of a given size would exhibit the same detection time for a prey of a given identity and  
385 size at a given temperature. I thereby allowed for each of these variables to differ from ob-  
386 servation to observation, site to site, and across time periods, assuming only their relationship  
387 to detection times to have remained unchanged. This assumption seems defensible given the  
388 relatively slow-to-evolve physiological and structural basis of whelk handling times (Carriker,  
389 1981): rasping and digesting and involving the evolutionary arms race between whelks and their  
390 prey. However, handling and hence detection times may be far more changeable for other types  
391 of predator-prey interactions depending on the species' biological attributes and aspects of the  
392 feeding process on which feeding surveys rely (e.g., whether feeding events are observed directly  
393 or by the examination of gut contents (Novak *et al.*, 2017)). For some species, such as those  
394 involving more specialized predator-prey pairs (DeLong & Coblenz, 2021), handling times could  
395 be just as labile as species abundances and prey preferences, and could in fact respond to these  
396 as well (Okuyama, 2010; Stouffer & Novak, 2021). In such contexts where the consistency of  
397 detection times may be weak, detection-time variation will need to be large for the statistical

---

<sup>2</sup>Anecdotally, populations of *H. haustorium* around Kaikoura on the east coast of the South Island, where mussels are rare, could not be brought to feed on them in the lab (although rare field observations thereof occurred), while populations from the west coast, where mussels are abundant, readily did so (Novak, 2008).

398 mechanism of correlated ratios to contribute to feeding-rate stability.

399 Two additional considerations pertain more to methodological details. First, it *is* possible  
400 for a spurious correlation to occur when evaluating feeding-rate stability through diet surveys.  
401 This is because the apparent diet proportions ( $n_i/n$  of eqn. 1) will themselves become correlated  
402 if the sample sizes ( $n$ ) of both sets of surveys are correlated, just as Pearson (1897) warned. This  
403 was not the case in this study (Table 1;  $r = 0.01$ ,  $p = 0.98$ ;  $r_{10} = -0.28$ ,  $p = 0.65$ ;  $r_s = -0.40$ ,  
404  $p = 0.52$ ), but may be quite likely to occur in other studies when sites exhibit a consistent  
405 gradient in predator abundances due to underlying environmental or productivity differences  
406 (e.g., Novak, 2013; Winemiller, 1990). Second, although it is possible that the higher overall  
407 feeding rate of *H. haustorium* in 1968–9 versus 2004 was due to a change in their size distribution,  
408 it is also possible that Paine’s and my feeding surveys differed in a biased way in regards to  
409 our ability to find larger versus smaller, or feeding versus non-feeding individuals; on average,  
410 Paine was almost 2.5 times more likely to find feeding individuals than me (Table 1). Given  
411 Paine’s extensive experience with intertidal feeding surveys, the fact that he and his frequent  
412 field assistant, Terrence Beckett, compared and saw no difference between their independent  
413 surveys<sup>3</sup>, and the fact that smaller and non-feeding individuals tend to be more difficult to  
414 locate (especially by relative novices like me in 2004), I consider biases due to differences in  
415 survey ability improbable. The issue of bias in resurvey studies more generally requires attention  
416 nonetheless, just as it does when manipulative experiments are repeated (Kimmel *et al.*, 2021).

---

<sup>3</sup>As recorded in Paine’s field notes.

## 417 **Conclusions**

418 Overall, the results of my study draw attention to the potential for the detection times of feeding  
419 events to alter the interpretation of predator diet data. Variation in detection times has been  
420 little studied relative to the substantial effort that has gone into the study of foraging strategies  
421 and prey preferences. Most relevant work has focused on the gut-evacuation rates of prey mass  
422 in fishes, but with little focus on generalist predators' diverse prey attributes per se (Preston  
423 *et al.*, 2017). In the functional-response literature, handling and digestion times are primarily  
424 considered to be important only at high prey abundances where feeding rates are limited by  
425 saturation or satiation (Jeschke *et al.*, 2002). The potential for the effect of which Pearson  
426 (1897) warned to alter the interpretation of apparent diets for many more types of taxa indicates  
427 that more attention to detection times is warranted, and that factors to which handling and  
428 digestion times are sensitive may be more important in structuring feeding rates (i.e. process-rate  
429 variation) than currently assumed, even at low prey abundances. Feeding rates may be far less  
430 changing than inferred by surveys of apparent diets and community structure alone. As such,  
431 an improved understanding of detection times will not only be relevant to historical resurveys  
432 and other temporal analyses of community and interaction-network structure (Bramon Mora  
433 *et al.*, 2020), but will also be relevant to studies describing biogeographic patterns in these to  
434 infer how communities function (Bartley *et al.*, 2019; Tylianakis & Morris, 2017).

## 435 Acknowledgments

436 I am grateful to Bob Paine (1933–2016) for providing his data to me before the first field  
437 season of my Ph.D. work in 2004. I also thank William (Bill) J. Ballantine (1937–2015) for his  
438 hospitality while I was at the Leigh Marine Laboratory. As recorded in his notebooks, Paine  
439 received substantial field assistance from Terrence (Terry) Beckett, as well as from Dick Martin,  
440 Charles (Chuck) Galt, M. Larkum, and Dreseks (first names unknown). My field season was  
441 enabled by the support of the University of Chicago Hinds Fund. The subsequent laboratory-  
442 based detection time experiments were enabled by a NSF DEB-0608178 award and an EPA  
443 STAR fellowship. The approach to feeding rate estimation was derived with the support of NSF  
444 DEB-1353827. This manuscript was completed while on sabbatical as a visiting scholar hosted  
445 by Jennifer Ruesink at the University of Washington. I thank Kyle Coblentz, Bruce Menge, and  
446 Rebecca Terry for their valuable comments on the manuscript.

## 447 Code and data availability

448 All code and data used in the presented analyses, as well as data which Bob collected at addi-  
449 tional sites to which I was unable to return, are available at [https://github.com/marknovak/](https://github.com/marknovak/NZPaineFrates)  
450 `NZPaineFrates`.

## 451 References

452 Abrams, P. A. (1999). The adaptive dynamics of consumer choice. *The American Naturalist*,  
453 153, 83–97.



- 454 Aldrich, J. (1995). Correlations genuine and spurious in Pearson and Yule. *Statistical Science*,  
455 10, 364–376.
- 456 Atcheson, M. E., Myers, K. W., Beauchamp, D. A. & Mantua, N. J. (2012). Bioenergetic  
457 response by steelhead to variation in diet, thermal habitat, and climate in the North Pacific  
458 ocean. *Transactions of the American Fisheries Society*, 141, 1081–1096.
- 459 Atkinson, G., Watson, P., Maughan, R. J., Shirreffs, S. M. & Nevill, A. M. (2004). A spurious  
460 correlation. *Journal of Applied Physiology*, 97, 792–793.
- 461 Bajkov, A. D. (1935). How to estimate the daily food consumption of fish under natural condi-  
462 tions. *Transactions of the American Fisheries Society*, 65, 288–289.
- 463 Barco, A., Marshall, B., Houart, R. & Oliverio, M. (2015). Molecular phylogenetics of Haustriinae  
464 and Pagodulinae (Neogastropoda: Muricidae) with a focus on New Zealand species. *Journal*  
465 *of Molluscan Studies*, 81, 476–488.
- 466 Bartley, T. J., McCann, K. S., Bieg, C., Cazelles, K., Granados, M., Guzzo, M. M., MacDougall,  
467 A. S., Tunney, T. D. & McMeans, B. C. (2019). Food web rewiring in a changing world. *Nature*  
468 *Ecology & Evolution*, 3, 345–354.
- 469 Benincà, E., Ballantine, B., Ellner, S. P. & Huisman, J. (2015). Species fluctuations sustained  
470 by a cyclic succession at the edge of chaos. *Proceedings of the National Academy of Sciences*,  
471 112, 6389–6394.

- 472 Birkeland, C. (1974). Interactions between a sea pen and seven of its predators. *Ecological*  
473 *Monographs*, 44, 211–232.
- 474 Blomberg, S. P., Garland, T. & Ives, A. R. (2003). Testing for phylogenetic signal in comparative  
475 data: Behavioral traits are more labile. *Evolution*, 57, 717–745.
- 476 Bramon Mora, B., Shin, E., CaraDonna, P. J. & Stouffer, D. B. (2020). Untangling the seasonal  
477 dynamics of plant-pollinator communities. *Nature Communications*, 11, 4086.
- 478 Bravais, A. (1844). *Analyse mathématique sur les probabilités des erreurs de situation d'un*  
479 *point*. Impr. Royale.
- 480 Campos, R. E. & Lounibos, L. (2000). Natural prey and digestion times of *Toxorhynchites rutilus*  
481 (Diptera: Culicidae) in southern Florida. *Annals of the Entomological Society of America*, 93,  
482 1280–1287.
- 483 Carriker, M. R. (1981). Shell penetration and feeding by Naticacean and Muricacean predatory  
484 gastropods: A synthesis. *Malacologia*, 20, 403–422.
- 485 Chen, I.-C., Shiu, H.-J., Benedick, S., Holloway, J. D., Chey, V. K., Barlow, H. S., Hill, J. K. &  
486 Thomas, C. D. (2009). Elevation increases in moth assemblages over 42 years on a tropical  
487 mountain. *Proceedings of the National Academy of Sciences*, 106, 1479–1483.
- 488 Costello, M. J. (2015). Daily surface water temperature data collected from bucket casts from

489 pier at Leigh Marine Laboratory, Auckland, New Zealand from 1967-01-01 to 2011-04-30  
490 (NCEI Accession 0127323). *NOAA National Centers for Environmental Information*.

491 Dayton, P. K., Dethier, M. N., Duggins, D., Kareiva, P., Koehl, M., Menge, B. A., Pfister, C. A.,  
492 Ruesink, J. L., Sebens, K., Silliman, B. R. & Wootton, J. T. (2016). Robert Treat Paine III,  
493 1933–2016. *The Bulletin of the Ecological Society of America*, 97, 359–363.

494 DeLong, J. P. & Coblenz, K. E. (2021). Prey diversity constrains the adaptive potential of  
495 predator foraging traits. *Oikos*, n/a.

496 Englund, G. & Leonardsson, K. (2008). Scaling up the functional response for spatially hetero-  
497 geneous systems. *Ecology Letters*, 11, 440–449.

498 Estes, J. A., Dayton, P. K., Kareiva, P., Levin, S. A., Lubchenco, J., Menge, B. A., Palumbi,  
499 S. R., Power, M. E. & Terborgh, J. (2016). A keystone ecologist: Robert Treat Paine, 1933–  
500 2016. *Ecology*, 97, 2905–2909.

501 Evans, J. & Atkins, J. (2013). Seawater temperature dataset at Goat Island, Leigh New Zealand  
502 from 1967 to 2011. [Http://hdl.handle.net/2292/20612](http://hdl.handle.net/2292/20612).

503 Fairweather, P. & Underwood, A. (1983). The apparent diet of predators and biases due to  
504 different handling times of their prey. *Oecologia*, 56, 169–179

505 Haig, B. D. (2003). What is a spurious correlation? *Understanding Statistics: Statistical Issues*  
506 *in Psychology, Education, and the Social Sciences*, 2, 125–132.

- 507 Håkanson, L. & Stenström-Khalili, M. I. (2009). Uncertainties in data and spurious correlations  
508 related to the Redfield ratio. *International Review of Hydrobiology*, 94, 338–351.
- 509 Hilton, G. M., Houston, D. C. & Furness, R. W. (1998). Which components of diet quality affect  
510 retention time of digesta in seabirds? *Functional Ecology*, 12, 929–939.
- 511 Hughes, B. B., Beas-Luna, R., Barner, A. K., Brewitt, K., Brumbaugh, D. R., Cerny-Chipman,  
512 E. B., Close, S. L., Coblenz, K. E., de Nesnera, K. L., Drobnitch, S. T., Figurski, J. D.,  
513 Focht, B., Friedman, M., Freiwald, J., Heady, K. K., Heady, W. N., Hettinger, A., Johnson,  
514 A., Karr, K. A., Mahoney, B., Moritsch, M. M., Osterback, A.-M. K., Reimer, J., Robinson,  
515 J., Rohrer, T., Rose, J. M., Sabal, M., Segui, L. M., Shen, C., Sullivan, J., Zuercher, R.,  
516 Raimondi, P. T., Menge, B. A., Grorud-Colvert, K., Novak, M. & H, M. (2017). Long-term  
517 studies contribute disproportionately to ecology and policy. *BioScience*, 67, 271–281.
- 518 Hughes, R. N. & Burrows, M. T. (1991). Diet selection by dogwhelks in the field: an example  
519 of constrained optimization. *Animal Behaviour*, 42, 47–55.
- 520 Jackson, D. A. & Somers, K. M. (1991). The spectre of ‘spurious’ correlations. *Oecologia*, 86,  
521 147–151.
- 522 Jeschke, J. M., Kopp, M. & Tollrian, R. (2002). Predator functional responses: Discriminating  
523 between handling and digesting prey. *Ecological Monographs*, 72, 95–112.
- 524 Katz, C. H. (1985). A nonequilibrium marine predator-prey interaction. *Ecology*, 66, 1426–1438.

- 525 Kenney, B. C. (1982). Beware of spurious self-correlations! *Water Resources Research*, 18,  
526 1041–1048.
- 527 Kim, J.-H. (1999). Spurious correlation between ratios with a common divisor. *Statistics &*  
528 *probability letters*, 44, 383–386.
- 529 Kimmel, K., Dee, L. E., Avolio, M. L. & Ferraro, P. J. (2021). Causal assumptions and causal  
530 inference in ecological experiments. *Trends in Ecology & Evolution*, 36, 1141–1152.
- 531 Kondoh, M. (2003). Foraging adaptation and the relationship between food-web complexity and  
532 stability. *Science*, 299, 1388–1391.
- 533 Kuebbing, S. E., Reimer, A. P., Rosenthal, S. A., Feinberg, G., Leiserowitz, A., Lau, J. A. &  
534 Bradford, M. A. (2018). Long-term research in ecology and evolution: a survey of challenges  
535 and opportunities. *Ecological Monographs*, 88, 245–258.
- 536 Luckens, P. A. (1975). Predation and intertidal zonation of barnacles at Leigh, New Zealand.  
537 *New Zealand Journal of Marine and Freshwater Research*, 9, 355–378.
- 538 McCoy, S. J. & Pfister, C. A. (2014). Historical comparisons reveal altered competitive interac-  
539 tions in a guild of crustose coralline algae. *Ecology Letters*, 17, 475–483.
- 540 McKoy, J. L. (1969). *Some aspects of the ecology of the gastropod family Thaisidae in the*  
541 *Wellington area*. MS, Victoria University.

- 542 Menge, B. A. (1972). Foraging strategy of a starfish in relation to actual prey availability and  
543 environmental predictability. *Ecological Monographs*, 42, 25–50.
- 544 Menge, B. A., Gravem, S. A., Johnson, A., Robinson, J. W. & Poirson, B. N. (2022). Increasing  
545 instability of a rocky intertidal meta-ecosystem. *Proceedings of the National Academy of*  
546 *Sciences*, 119.
- 547 Menge, J. L. (1974). Prey selection and foraging period of the predaceous rocky intertidal snail,  
548 *Acanthina punctulata*. *Oecologia*, 17, 293–316.
- 549 Moritz, C., Patton, J. L., Conroy, C. J., Parra, J. L., White, G. C. & Beissinger, S. R. (2008).  
550 Impact of a century of climate change on small-mammal communities in Yosemite National  
551 Park, USA. *Science*, 322, 261–264
- 552 Morton, J. & Miller, M. (1968). *The New Zealand Sea Shore*. Collins, London.
- 553 Murdoch, W. W. (1973). The functional response of predators. *Journal of Applied Ecology*, 10,  
554 321–351.
- 555 Novak, M. (2008). *Trophic omnivory and the structure, strength, and nonlinear nature of species*  
556 *interactions across a productivity gradient*. PhD, University of Chicago.
- 557 Novak, M. (2010). Estimating interaction strengths in nature: experimental support for an  
558 observational approach. *Ecology*, 91, 2394–2405.
- 559 Novak, M. (2013). Trophic omnivory across a productivity gradient: intraguild predation theory

560 and the structure and strength of species interactions. *Proceedings of the Royal Society B:*  
561 *Biological Sciences*, 280.

562 Novak, M., Wolf, C., Coblenz, K. E. & Shepard, I. D. (2017). Quantifying predator dependence  
563 in the functional response of generalist predators. *Ecology Letters*, 20, 761–769.

564 Novak, M. & Wootton, J. T. (2008). Estimating nonlinear interaction strengths: an observation-  
565 based method for species-rich food webs. *Ecology*, 89, 2083–2089.

566 Okuyama, T. (2010). Prey density-dependent handling time in a predator-prey model. *Com-*  
567 *munity Ecology*, 11, 91–96.

568 O’Mahoney, S. (2020). *A nation-wide phylogenetic and phylogeographic investigation of the en-*  
569 *demic New Zealand oyster borers, *Haustrum scobina* and *Haustrum albomarginatum**. Master’s  
570 thesis, Victoria University of Wellington.

571 Ottaway, J. R. (1977). Predators of sea anemones. *Tuatara*, 22, 213–221.

572 Paine, R. (1971). A short-term experimental investigation of resource partitioning in a New  
573 Zealand rocky intertidal habitat. *Ecology*, 52, 1096–1106.

574 Paine, R. T. (1963). Trophic relationships of 8 sympatric predatory gastropods. *Ecology*, 44,  
575 63–73.

576 Paine, R. T. (1966). Food web complexity and species diversity. *The American Naturalist*, 100,  
577 65–75.



- 578 Palumbi, S. R., Estes, J. A., Kareiva, P., Levin, S. A., Lubchenco, J. & Power, M. E. (2017).  
579 Robert Treat Paine III (1933–2016). *Proceedings of the National Academy of Sciences*, 114,  
580 6881.
- 581 Patrick, B. R. (2001). *Predation rates along a wave exposure gradient on the east coast of the*  
582 *South Island, New Zealand*. PhD, University of Canterbury.
- 583 Pearson, K. (1895). Note on regression and inheritance in the case of two parents. *Proceedings*  
584 *of the Royal Society of London*, 58, 240–242.
- 585 Pearson, K. (1897). On a form of spurious correlation which may arise when indices are used in  
586 the measurement of organs. *Proceedings of the Royal Society of London*, 60, 489–498.
- 587 Perry, A. L., Low, P. J., Ellis, J. R. & Reynolds, J. D. (2005). Climate change and distribution  
588 shifts in marine fishes. *Science*, 308, 1912–1915.
- 589 Power, M. E., Estes, J. A., Kareiva, P., Levin, S., Lubchenco, J. &  
590 Palumbi, S. (2018). Biographical memoirs: Robert T. Paine, 1933-2016.  
591 [http://www.nasonline.org/publications/biographical-memoirs/memoir-pdfs/paine-](http://www.nasonline.org/publications/biographical-memoirs/memoir-pdfs/paine-robert.pdf)  
592 [robert.pdf](http://www.nasonline.org/publications/biographical-memoirs/memoir-pdfs/paine-robert.pdf).
- 593 Preston, D. L., Falke, L. P., Henderson, J. S. & Novak, M. (2019). Food-web interaction  
594 strength distributions are conserved by greater variation between than within predator–prey  
595 pairs. *Ecology*, 100, e02816.

- 596 Preston, D. L., Henderson, J. S., Falke, L. P. & Novak, M. (2017). Using survival models to  
597 estimate invertebrate prey identification times in a generalist stream fish. *Transactions of the*  
598 *American Fisheries Society*, 146, 1303–1314.
- 599 Riddell, E. A., Iknayan, K. J., Hargrove, L., Tremor, S., Patton, J. L., Ramirez, R., Wolf, B. O.  
600 & Beissinger, S. R. (2021). Exposure to climate change drives stability or collapse of desert  
601 mammal and bird communities. *Science*, 371, 633–636.
- 602 Rowe, R. J. & Terry, R. C. (2014). Small mammal responses to environmental change: integrat-  
603 ing past and present dynamics. *Journal of Mammalogy*, 95, 1157–1174.
- 604 Rowe, R. J., Terry, R. C. & Rickart, E. A. (2011). Environmental change and declining resource  
605 availability for small-mammal communities in the great basin. *Ecology*, 92, 1366–1375.
- 606 Shears, N. T. & Bowen, M. M. (2017). Half a century of coastal temperature records reveal  
607 complex warming trends in western boundary currents. *Scientific Reports*, 7, 14527.
- 608 Sorte, C. J. B., Davidson, V. E., Franklin, M. C., Benes, K. M., Doellman, M. M., Etter, R. J.,  
609 Hannigan, R. E., Lubchenco, J. & Menge, B. A. (2017). Long-term declines in an intertidal  
610 foundation species parallel shifts in community composition. *Global Change Biology*, 23, 341–  
611 352.
- 612 Speirs, D. C., Gurney, W. S. C., Hildrew, A. G. & Winterbottom, J. H. (2000). Long-term  
613 demographic balance in the Broadstone stream insect community. *Journal of Animal Ecology*,  
614 69, 45–58.

- 615 Stouffer, D. B. & Novak, M. (2021). Hidden layers of density dependence in consumer feeding  
616 rates. *Ecology Letters*, 24, 520–532.
- 617 Tan, K. S. (2003). Phylogenetic analysis and taxonomy of some southern Australian and New  
618 Zealand Muricidae (Mollusca: Neogastropoda). *Journal of Natural History*, 37, 911–1028.
- 619 Terry, R. C. & Rowe, R. J. (2015). Energy flow and functional compensation in great basin  
620 small mammals under natural and anthropogenic environmental change. *Proceedings of the*  
621 *National Academy of Sciences*, 112, 9656.
- 622 Thompson, J. N. (1998). Rapid evolution as an ecological process. *Trends in ecology & evolution*,  
623 13, 329–332.
- 624 Tingley, M. W., Monahan, W. B., Beissinger, S. R. & Moritz, C. (2009). Birds track their  
625 Grinnellian niche through a century of climate change. *Proceedings of the National Academy*  
626 *of Sciences*, 106, 19637–19643
- 627 Tylianakis, J. M. & Morris, R. J. (2017). Ecological networks across environmental gradients.  
628 *Annual Review of Ecology, Evolution, and Systematics*, 48, 25–48.
- 629 Uiterwaal, S. F. & DeLong, J. P. (2020). Using patterns in prey DNA digestion rates to quantify  
630 predator diets. *Molecular Ecology Resources*, 20, 1723–1732.
- 631 Urban, M. C., Bocedi, G., Hendry, A. P., Mihoub, J.-B., Pe'er, G., Singer, A., Bridle, J., Crozier,

- 632 L., De Meester, L. & Godsoe, W. (2016). Improving the forecast for biodiversity under climate  
633 change. *Science*, 353.
- 634 Walsby, J. R. (1977). Population variations in the grazing Turbinid *Lunella smaragda* (Mollusca:  
635 Gastropoda). *New Zealand Journal of Marine and Freshwater Research*, 11, 211–238.
- 636 Williams, M. R., Lamont, B. B. & He, T. (2021). Dealing with ‘the spectre of “spurious”  
637 correlations’: hazards in comparing ratios and other derived variables with a randomization  
638 test to determine if a biological interpretation is justified. *Oikos*, n/a.
- 639 Winemiller, K. O. (1990). Spatial and temporal variation in tropical fish trophic networks.  
640 *Ecological Monographs*, 60, 331–367.
- 641 Wolf, C., Novak, M. & Gitelman, A. I. (2017). Bayesian characterization of uncertainty in  
642 species interaction strengths. *Oecologia*, 184, 327–339.
- 643 Woodward, G., Spiers, D. C. & Hildrew, A. G. (2005). Quantification and resolution of a  
644 complex, size-structured food web. *Advances in Ecological Research*, 36, 85–135.
- 645 Yamamoto, T. (2004). Prey composition and prey selectivity of an intertidal generalist predator,  
646 *Muricodrupa fusca* (Küster) (Muricidae). *Marine Ecology*, 25, 35–49.
- 647 Yule, G. U. (1910). On the interpretation of correlations between indices or ratios. *Journal of*  
648 *the Royal Statistical Society*, 73, 644–647.
